# Supplementary material for: Histone variant macroH2A marks embryonic differentiation in vivo and acts as an epigenetic barrier to induced pluripotency
Source: PubMed Central journal article supplement — J Cell Sci. 2012 Dec 15;125(24):6094–104. doi: 10.1242/jcs.113019 (PMC3585521; doi:10.1242/jcs.113019), 2012-12-15
Supplement: supp_125.24.6094_JCS113019.pdf [file supp_125.24.6094_JCS113019.pdf]

**Figure S1**

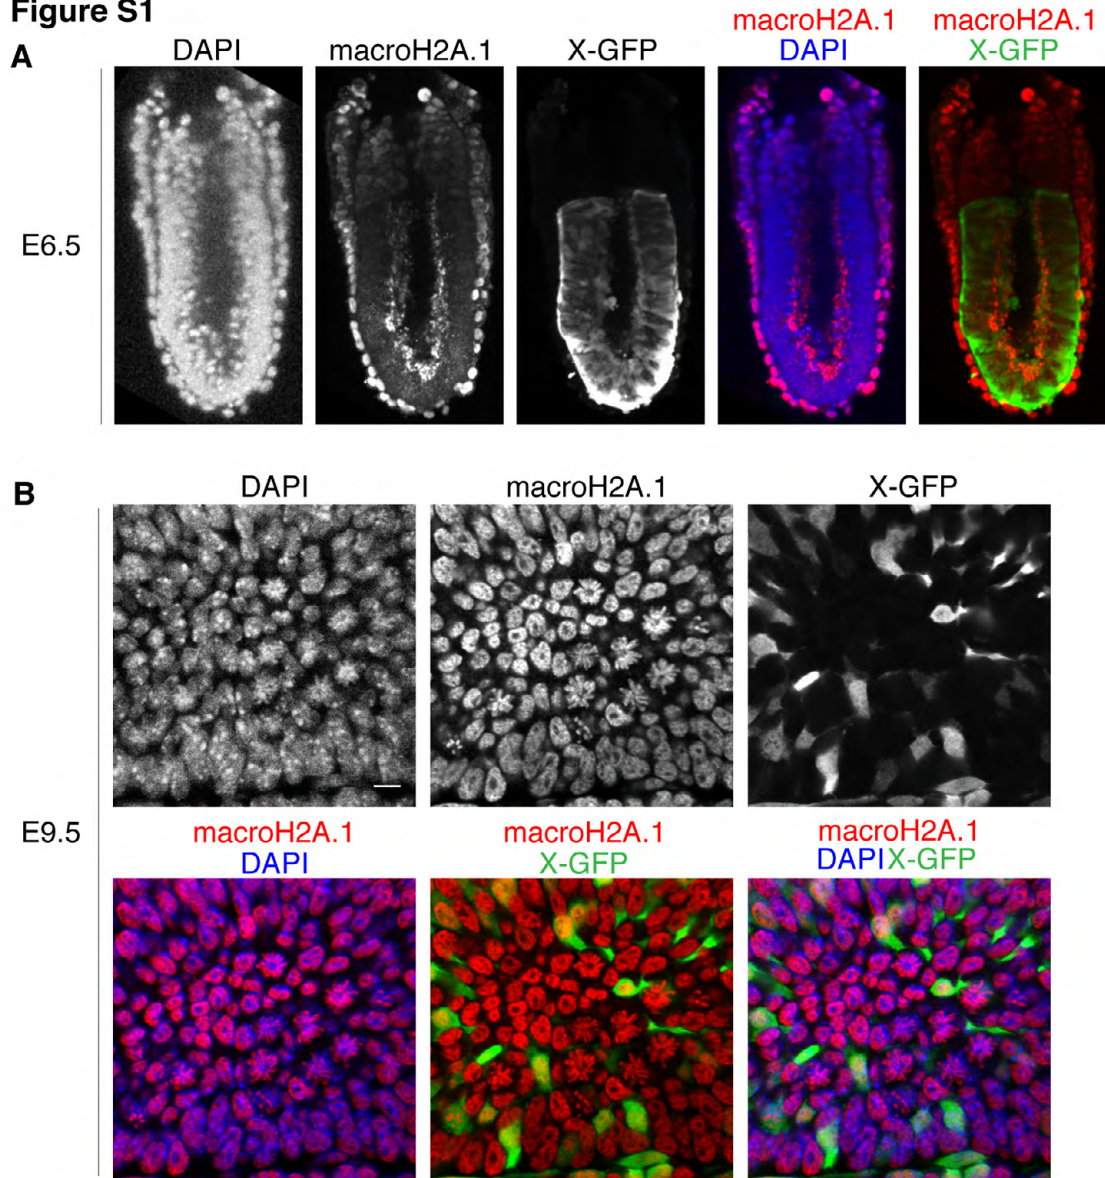

**Fig. S1. (A)** Example of E6.5 female *X-GFP* mouse conceptus wholemount immunofluorescence against macroH2A.1 (red) and GFP (green). MacroH2A.1 is highly expressed in the visceral endoderm and to some extent in the extra embryonic ectoderm but is not detected in the epiblast, precursor of all somatic lineages (mosaic *X-GFP* expression due to random X chromosome inactivation). DAPI is in blue. Images are projected confocal Z-sections. **(B)** E9.5 *X-GFP* mouse embryo immunofluorescence against macroH2A.1 (red) and GFP (green) showing cells of a somite. Nuclear macroH2A.1 is detected in all cells. DAPI is in blue. Images are projected confocal Z-sections. Scale bar = 5  $\mu$ m.

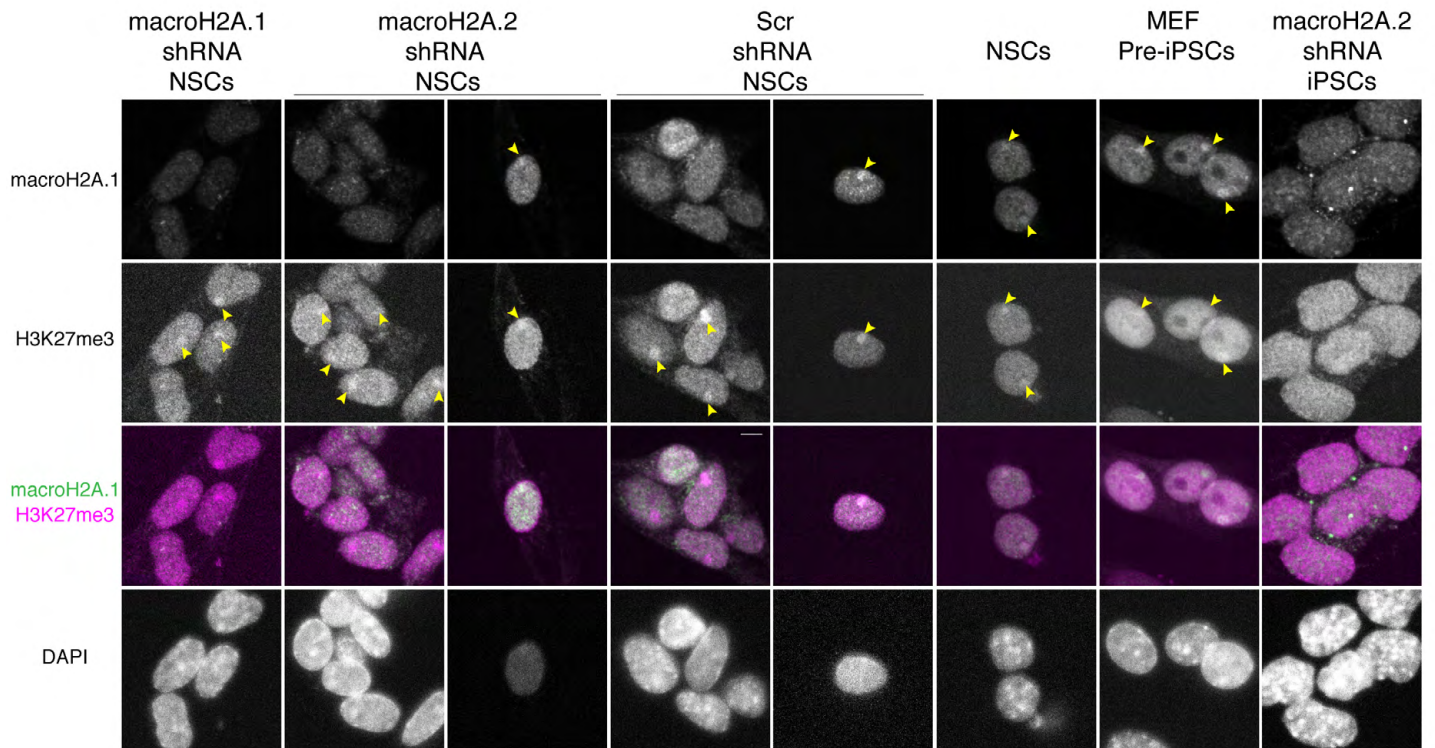

**Fig. S2.** Immunofluorescence analysis of macroH2A.1 and H3K27me3 in NSCs, pre-iPSCs and iPSCs. Yellow arrowheads indicate the inactive X chromosome. MacroH2A.1 is in green and H3K27me3 in magenta in merge panels. Scale bar = 5  $\mu$ m.

**Figure S3**  
macroH2A.1+.2 shRNA iPSCs chimeras

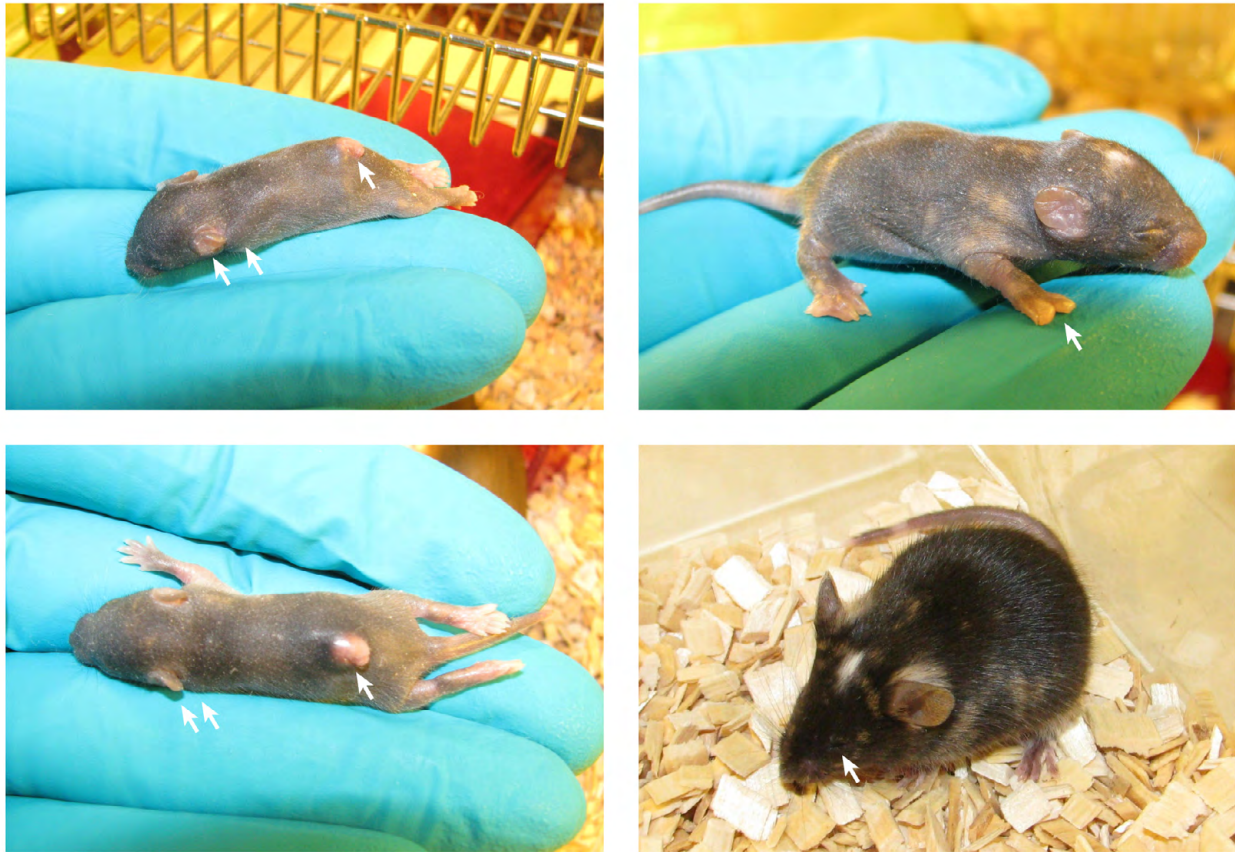

**Fig. S3.** Examples of developmental defects seen in macroH2A.1 + .2 shRNA iPSCs chimeras.

**Table S1**

| <b>Applied Biosystems Custom Taqman probes</b> |                             |
|------------------------------------------------|-----------------------------|
| <b>Gene name</b>                               | <b>Probe</b>                |
| <i>Oct4</i> DE                                 | AATCTGCTATTGAGGAAGC         |
| <i>Oct4</i> PE                                 | AAGCAGGGTATCTCC             |
| <i>Oct4</i> PP                                 | TGTCCGGTGACCCAAG            |
| <i>Sox2</i> RR1                                | AGCAATGCTGAGAAAT            |
| <i>Sox2</i> PP                                 | ACAGGCGTGCGCCGT             |
| <i>Sox2</i> RR2                                | AGACTCTAAAAGAATTTCCCG       |
| <i>G3PDH</i> PP                                | AGCCCACACGCTTG              |
| <i>C-Jun</i> Promoter                          | CCAATGGGAAAGCC              |
| <i>B-globin</i> PP                             | CGTAGAGCCACACCCT            |
| <i>Thy1</i> PP                                 | TTCCCTGGAGACCTGT            |
| <b>Primers</b>                                 |                             |
| <b>Gene name</b>                               | <b>Sequence</b>             |
| <i>Oct4</i> DE-F                               | CCTCTCGTCCTAGCCCTTCCT       |
| <i>Oct4</i> DE-R                               | GAAGCCGCCAAGTTCACAA         |
| <i>Oct4</i> PE-F                               | CCGGAGTCCCTGGAGGAA          |
| <i>Oct4</i> PE-R                               | CTCCTCAAAGACAGAGCCTCAGA     |
| <i>Oct4</i> PP-F                               | TCCGAGCAACTGGTTTGTGA        |
| <i>Oct4</i> PP-R                               | TTTCAACCTTCAAGGTCCTCTCA     |
| <i>Sox2</i> RR1-F                              | GGTGGTCGTCAAACCTCTGCTAAT    |
| <i>Sox2</i> RR1-R                              | CCTCCTCTCCTAATCTCCTTATGGA   |
| <i>Sox2</i> PP-F                               | TGGTGCTGTTTACCCACTTCCT      |
| <i>Sox2</i> PP-R                               | CGCCCCCGTTTTTCAG            |
| <i>Sox2</i> RR2-F                              | CAGGTTCCCCTCTAATTAATGCA     |
| <i>Sox2</i> RR2-R                              | CATTACCACGTGAATAATCCTATATGC |
| <i>G3PDH</i> PP-F                              | TCCCCTCCCCCTATCAGTTC        |
| <i>G3PDH</i> PP-R                              | GACCCGCCTCATTTTTGAAA        |
| <i>B-globin</i> PP-F                           | TGTCATCACCGAAGCCTGATT       |
| <i>B-globin</i> PP-R                           | TGTGAGCAGATTGGCCCTTAC       |
| <i>C-Jun</i> Promoter-F                        | CCGCCCCCTGAGAAC             |
| <i>C-Jun</i> Promoter-R                        | CAATCCCTAAAATAGCCCATGAT     |

|                  |                            |
|------------------|----------------------------|
| <i>Thyl</i> PP-F | GGCTGCTTCTGATTATTTAGTTTGTC |
| <i>Thyl</i> PP-R | ACCCACCATACGCCCTTATG       |

**Table S2**

| <b>Applied Biosystems Taqman probe/assays</b> |                                                 |
|-----------------------------------------------|-------------------------------------------------|
| <b>Gene name</b>                              | <b>Probe ID</b>                                 |
| GAPDH                                         | 4352339E                                        |
| Nanog                                         | Mm02384862_g1                                   |
| Rex1                                          | Mm03053975_g1                                   |
| Klf4                                          | Mm00516104_m1                                   |
| Oct4                                          | Mm00658129_gH                                   |
| T / Brachyury                                 | Mm01318252_m1                                   |
| Gata4                                         | Mm00484689_m1                                   |
| <b>Primers and custom probes</b>              |                                                 |
| <b>Gene name</b>                              | <b>Sequence</b>                                 |
| Retroviral Oct4-F                             | TGGTACGGGAAATCACAAGTTTGTA                       |
| Retroviral Oct4-R                             | GGTGAGAAGGCGAAGTCTGAAG                          |
| Retroviral Oct4-probe                         | FAM-CACCTTCCCCATGGCTG-MGB                       |
| Retroviral Klf4-F                             | TGGTACGGGAAATCACAAGTTTGTA                       |
| Retroviral Klf4-R                             | GAGCAGAGCGTCGCTGA                               |
| Retroviral Klf4-probe                         | FAM-CCCCTTACCATGGCTG-MGB                        |
| Endogenous Oct4-F                             | TTCCACCAGGCCCCC                                 |
| Endogenous Oct4-R                             | GGTGAGAAGGCGAAGTCTGAAG                          |
| Endogenous Oct4-probe                         | FAM-CCCACCTTCCCCATGGCT-MGB                      |
| <b>Primers used with SYBR green</b>           |                                                 |
| <b>Gene name</b>                              | <b>Primer sequence</b>                          |
| GAPDH-F                                       | CCCACTAACATCAAATGGGG                            |
| GAPDH-R                                       | CCTTCCACAATGCCAAAGTT                            |
| mH2A1-F                                       | CACCATGTGAGCCGCGGGGAAG<br>(Kapoor et al., 2010) |
| mH2A1-R                                       | GTTGGCGTCCAGCTTGGCCA (Kapoor et al., 2010)      |
| mH2A2-F                                       | GGACCAAAGGCAAGTCAGAG (Kapoor et al., 2010)      |
| mH2A2-R                                       | TCCGAGGTGGAATTTGATGT (Kapoor et al., 2010)      |
